# Supplementary material for: Vitamin D Status in a Rural Italian Population
Source: MDPI journal article supplement (doi:10.3390/reports5010001), 2021-12-27
Supplement: s1 [file s1]

**Table S1.** Vitamin D (25(OH)D) serum means, standard deviations (SD) and 95% confidence intervals by age classes and month of blood collection. Men 20–81 years old, MATISS study 1993–1996 [30,31]. All mean values are in bold.

| Month of<br>the Year | MEN      |      |     |       |    |          |      |     |        |    |                            |      |    |        |    |
|----------------------|----------|------|-----|-------|----|----------|------|-----|--------|----|----------------------------|------|----|--------|----|
|                      | 20–39    |      |     |       |    | 40–59    |      |     |        |    | 60–81                      |      |    |        |    |
|                      | <i>n</i> | Mean | SD  | 95%CI |    | <i>n</i> | Mean | SD  | 95% CI |    | <i>n</i>                   | Mean | SD | 95% CI |    |
| J                    | 37       | 17.5 | 6.7 | 15    | 20 | 45       | 13.3 | 6.5 | 11     | 15 | 49                         | 12.9 | 5  | 11     | 14 |
| F                    | 46       | 15.4 | 6.5 | 13    | 17 | 85       | 13.8 | 8.3 | 12     | 16 | 87                         | 12.1 | 5  | 11     | 13 |
| M                    | 2        | 27.4 | 14  | -     | -  | 30       | 13.2 | 6.6 | -      | -  | 9                          | 12.1 | 8  | -      | -  |
| A                    | 25       | 17.3 | 7.8 | -     | -  | 16       | 15.8 | 5.5 | -      | -  | 19                         | 13.6 | 6  | -      | -  |
| M                    | 2        | 24.1 | 7.1 | -     | -  | 2        | 20.6 | 8.6 | -      | -  | serum sample not available |      |    |        |    |
| J                    | 1        | 45.3 | -   | -     | -  | 1        | 21   | -   | -      | -  | 2                          | 16.1 | 9  | -      | -  |
| J                    | 14       | 31.1 | 8.5 | -     | -  | 15       | 32.6 | 11  | -      | -  | 19                         | 31.2 | 10 | -      | -  |
| A                    | 105      | 37.8 | 13  | 35    | 40 | 43       | 29.8 | 7.3 | 28     | 32 | 13                         | 29.1 | 10 | -      | -  |
| S                    | 56       | 38.8 | 13  | 35    | 42 | 70       | 33.8 | 11  | 31     | 36 | 15                         | 29.2 | 6  | -      | -  |
| O                    | 50       | 30.7 | 8   | 28    | 33 | 188      | 27   | 8.2 | 26     | 28 | 73                         | 25.3 | 9  | 23     | 28 |
| N                    | 4        | 26.3 | 3.9 | -     | -  | 22       | 22.4 | 9.4 | -      | -  | 22                         | 19.7 | 7  | -      | -  |
| D                    | 4        | 18.6 | 7.6 | -     | -  | 2        | 16.8 | 3.8 | -      | -  | 1                          | 17.8 | -  | -      | -  |

**Table S2.** Vitamin D (25(OH)D) serum means, standard deviations (SD) and 95% confidence intervals by age classes and month of blood collection. Women 20–81 years old. MATISS study 1993–1996 [30,31]. All mean values are in bold.

| Month<br>of Year | WOMEN                      |             |      |        |      |                            |             |     |        |      |                            |             |     |        |      |
|------------------|----------------------------|-------------|------|--------|------|----------------------------|-------------|-----|--------|------|----------------------------|-------------|-----|--------|------|
|                  | 20–39 years old            |             |      |        |      | 40–59 years old            |             |     |        |      | 60–81 years old            |             |     |        |      |
|                  | <i>n</i>                   | Mean        | SD   | 95% CI |      | <i>n</i>                   | Mean        | SD  | 95% CI |      | <i>n</i>                   | Mean        | SD  | 95% CI |      |
| J                | 3                          | <b>22,6</b> | 14,8 | -      | -    | 27                         | <b>12</b>   | 4,8 | -      | -    | 28                         | <b>8,6</b>  | 3,5 | -      | -    |
| F                | 35                         | <b>14,2</b> | 6,4  | -      | -    | 79                         | <b>11,6</b> | 9   | 9,6    | 13,7 | 60                         | <b>7,6</b>  | 4,4 | 6,5    | 8,7  |
| M                | 83                         | <b>13,9</b> | 5,3  | 12,8   | 15   | 123                        | <b>11,1</b> | 4,4 | 10,3   | 11,9 | 90                         | <b>8,6</b>  | 4,1 | 9,4    | 8,2  |
| A                | 23                         | <b>14,2</b> | 5,1  | -      | -    | 77                         | <b>13,9</b> | 6,3 | 12,5   | 15,3 | 135                        | <b>11</b>   | 4,4 | 10     | 11,8 |
| M                | 23                         | <b>17,3</b> | 4,9  | -      | -    | 19                         | <b>14,5</b> | 5,4 | -      | -    | 171                        | <b>13,1</b> | 12  | 11     | 14,8 |
| J                | 33                         | <b>20,9</b> | 6,9  | 18,5   | 23,4 | 47                         | <b>16,7</b> | 5,8 | 15     | 18,4 | 32                         | <b>14,9</b> | 6,6 | 13     | 17,2 |
| J                | 10                         | <b>21,4</b> | 7    | -      | -    | 75                         | <b>21,8</b> | 6,8 | 20,2   | 23,3 | 37                         | <b>18,1</b> | 5,1 | 16     | 19,7 |
| A                | serum sample not available |             |      |        |      | serum sample not available |             |     |        |      | serum sample not available |             |     |        |      |
| S                | 115                        | <b>34,2</b> | 13   | 31,7   | 36,6 | 117                        | <b>26,6</b> | 7,2 | 25,3   | 27,9 | 22                         | <b>27,1</b> | 10  | -      | -    |
| O                | 119                        | <b>28,9</b> | 9,9  | 27,1   | 30,7 | 90                         | <b>21,9</b> | 7,2 | 20,4   | 23,4 | 14                         | <b>21,1</b> | 5,5 | -      | -    |
| N                | 113                        | <b>21,1</b> | 8    | 19,6   | 22,6 | 157                        | <b>18,7</b> | 6,2 | 16,7   | 18,7 | 115                        | <b>13,9</b> | 5,5 | 15     | 17,9 |
| D                | 49                         | <b>16,4</b> | 6,9  | 16,3   | 20,3 | 38                         | <b>15,3</b> | 8,5 | 12,5   | 18   | 15                         | <b>12,5</b> | 4,1 | -      | -    |

**Table S3.** Cardiovascular risk factors and conditions by Vitamin D (25(OH)D) status. Men 20–81 years old. MATISS study 1993–1996 [30,31].

| Risk Factors                   | MEN                 |      |        |        |          |                         |        |      |          |      |                     |      |      |        |      |
|--------------------------------|---------------------|------|--------|--------|----------|-------------------------|--------|------|----------|------|---------------------|------|------|--------|------|
|                                | Vitamin D <20 ng/ml |      |        |        |          | 20≤ Vitamin D <30 ng/ml |        |      |          |      | Vitamin D ≥30 ng/ml |      |      |        |      |
|                                | <i>n</i>            | mean | SD     | 95% CI |          | <i>n</i>                | mean   | SD   | 95% CI   |      | <i>n</i>            | mean | SD   | 95% CI |      |
| Vitamin D (ng/L)               | 477                 | 12,6 | 4,2    | 12,2   | 13       | 354                     | 25     | 2,8  | 24,7     | 25,3 | 343                 | 39,3 | 9,2  | 38,3   | 40,3 |
| Systolic blood pressure (mmHg) | 477                 | 138  | 19,9   | 136    | 140      | 354                     | 138    | 17,8 | 136      | 140  | 343                 | 135  | 16   | 134    | 137  |
| Diastolic pressure (mmHg)      | 477                 | 84,5 | 13,5   | 83,3   | 85,7     | 354                     | 84,5   | 11,3 | 83,3     | 85,6 | 343                 | 83,8 | 11,5 | 82,6   | 85   |
| Body mass index (kg/m²)        | 474                 | 26,9 | 3,7    | 26,6   | 27,3     | 354                     | 27,1   | 3,4  | 26,8     | 27,5 | 342                 | 26,6 | 3,1  | 26,2   | 26,9 |
| Glycemia (mg/dL)               | 477                 | 91   | 23,4   | 88,9   | 93,1     | 353                     | 90     | 19,7 | 87,9     | 92,1 | 342                 | 87,9 | 10,8 | 86,7   | 89   |
| Total cholesterol (mg/dL)      | 477                 | 221  | 45,4   | 217    | 225      | 353                     | 217    | 42,2 | 213      | 222  | 342                 | 209  | 46,7 | 204    | 214  |
| HDL cholesterol (mg/dL)        | 477                 | 45   | 12,4   | 43,9   | 46,1     | 353                     | 45,2   | 12   | 44       | 46,5 | 342                 | 47,7 | 11   | 46,5   | 48,8 |
| Triglycerides (mg/dL)          | 477                 | 175  | 116    | 164    | 185      | 353                     | 185    | 152  | 170      | 201  | 342                 | 163  | 163  | 146    | 181  |
|                                |                     |      |        |        |          |                         |        |      |          |      |                     |      |      |        |      |
| Risk conditions                | <i>n</i>            | %    | 95% CI |        | <i>n</i> | %                       | 95% CI |      | <i>n</i> | %    | 95% CI              |      |      |        |      |
| Current smoking                | 477                 | 48   | 44     | 53     | 354      | 43                      | 38     | 48   | 343      | 36   | 31                  | 41   |      |        |      |
| Overweight                     | 474                 | 47   | 42     | 51     | 354      | 58                      | 53     | 63   | 342      | 52   | 47                  | 58   |      |        |      |
| Obesity                        | 474                 | 21   | 18     | 25     | 354      | 17                      | 13     | 21   | 342      | 14   | 10                  | 18   |      |        |      |
| Hypertension                   | 477                 | 48   | 43     | 52     | 354      | 48                      | 43     | 53   | 343      | 45   | 40                  | 51   |      |        |      |
| Hypercholesterolemia           | 477                 | 32   | 28     | 36     | 354      | 33                      | 28     | 38   | 343      | 21   | 17                  | 26   |      |        |      |
| Diabetes                       | 477                 | 6    | 3,9    | 8,1    | 353      | 4                       | 2      | 6,1  | 342      | 1,9  | 0,5                 | 3,3  |      |        |      |

Age-standardized mean and standard deviation using age distribution of the 1994 Latina 20–81 years old population (Italian National Institute of Statistics-ISTAT). SD: standard deviation; CI: confidence interval. Current smoking: consumption of at least one cigarette a day. Overweight: body mass index between 25 and 29 kg/m<sup>2</sup>. Obesity: body mass index ≥30 kg/m<sup>2</sup>. Hypertension: mean of two consecutive blood pressure values of systolic ≥140 mmHg or diastolic ≥90 mmHg or under regular pharmacological treatment. Hypercholesterolemia: total cholesterol ≥240 mg/dL (6.2 mmol/L) or under regular lipid lowering treatment. Diabetics: persons with blood glucose ≥126 mg/dl (7 mmol/L) or under regular antidiabetic treatment (oral hypoglycemic medication and/or insulin) or with self-reported diabetes at the time of the screening.

**Table S4.** Cardiovascular risk factors and conditions by Vitamin D (25(OH)D) status. Women 20–81 years old. MATISS study 1993–1996 [30,31].

| Risk Factors                   | WOMEN               |       |         |        |          |                           |         |      |          |       |                     |       |      |        |       |
|--------------------------------|---------------------|-------|---------|--------|----------|---------------------------|---------|------|----------|-------|---------------------|-------|------|--------|-------|
|                                | Vitamin D <20 ng/mL |       |         |        |          | 20 ≤ Vitamin D < 30 ng/mL |         |      |          |       | Vitamin D ≥30 ng/mL |       |      |        |       |
|                                | <i>n</i>            | mean  | SD      | 95% CI |          | <i>n</i>                  | mean    | SD   | 95% CI   |       | <i>n</i>            | mean  | SD   | 95% CI |       |
| Vitamin D (ng/L)               | 1560                | 12.6  | 4.1     | 12.4   | 12.8     | 500                       | 24.2    | 2.9  | 23.9     | 24.4  | 214                 | 39.6  | 9.8  | 38.3   | 40.9  |
| Systolic blood pressure (mmHg) | 1558                | 136.8 | 20.4    | 135.8  | 137.8    | 500                       | 134.5   | 18.5 | 132.9    | 136.1 | 214                 | 129.6 | 13.2 | 127.8  | 131.4 |
| Diastolic pressure (mmHg)      | 1558                | 82.9  | 12.7    | 82.3   | 83.5     | 500                       | 82.2    | 11.7 | 81.2     | 83.3  | 214                 | 79.1  | 10.5 | 77.7   | 80.6  |
| Body mass index (kg/m²)        | 1556                | 27.9  | 4.8     | 27.6   | 28.1     | 500                       | 27.2    | 4.3  | 26.8     | 27.6  | 214                 | 26.6  | 4.2  | 26.0   | 27.1  |
| Glycemia (mg/dL)               | 1559                | 85.2  | 23.4    | 84.0   | 86.4     | 499                       | 82.1    | 18.5 | 80.5     | 83.7  | 214                 | 78.3  | 14.0 | 76.5   | 80.2  |
| Total cholesterol (mg/dL)      | 1559                | 215.8 | 39.4    | 213.9  | 217.8    | 499                       | 208.3   | 38.0 | 205.0    | 211.7 | 214                 | 210.1 | 38.0 | 205.0  | 215.2 |
| HDL cholesterol (mg/dL)        | 1559                | 53.3  | 12.2    | 52.7   | 53.9     | 499                       | 54.6    | 11.2 | 53.7     | 55.6  | 214                 | 58.3  | 14.0 | 56.4   | 60.1  |
| Triglycerides (mg/dL)          | 1559                | 118.8 | 68.4    | 115.4  | 122.2    | 499                       | 120.6   | 64.6 | 115.0    | 126.3 | 214                 | 122.4 | 78.7 | 111.9  | 132.9 |
|                                |                     |       |         |        |          |                           |         |      |          |       |                     |       |      |        |       |
| Risk conditions                | <i>n</i>            | %     | 95% CI  |        | <i>n</i> | %                         | 95% CI  |      | <i>n</i> | %     | 95% CI              |       |      |        |       |
| Current smoking                | 1558                | 18    | 16 19   |        | 500      | 18                        | 15 21   |      | 214      | 22    | 17 28               |       |      |        |       |
| Overweight                     | 1556                | 36    | 33 38   |        | 500      | 39                        | 35 43   |      | 214      | 29    | 23 36               |       |      |        |       |
| Obesity                        | 1556                | 32    | 30 34   |        | 500      | 26                        | 22 30   |      | 214      | 25    | 19 31               |       |      |        |       |
| Hypertension                   | 1558                | 46    | 44 49   |        | 500      | 44                        | 39 48   |      | 214      | 38    | 31 44               |       |      |        |       |
| Hypercholesterolemia           | 1560                | 28    | 26 31   |        | 500      | 21                        | 17 25   |      | 214      | 27    | 21 33               |       |      |        |       |
| Diabetes                       | 1559                | 4.1   | 3.1 5.1 |        | 499      | 2.9                       | 1.4 4.4 |      | 214      | 1.1   | 0.0 2.6             |       |      |        |       |

Age-standardized mean and standard deviation using age distribution of the 1994 Latina 20–81 years old population (Italian National Institute of Statistics-ISTAT). SD: standard deviation; CI: confidence interval. Current smoking: consumption of at least one cigarette a day. Overweight: body mass index between 25 and 29 kg/m<sup>2</sup>. Obesity: body mass index ≥30 kg/m<sup>2</sup>. Hypertension: mean of two consecutive blood pressure values of systolic ≥140 mmHg or diastolic ≥90 mmHg or under regular pharmacological treatment. Hypercholesterolemia: total cholesterol ≥240 mg/dL (6.2 mmol/L) or under regular lipid lowering treatment. Diabetics: persons with blood glucose ≥126 mg/dL (7 mmol/L) or under regular antidiabetic treatment (oral hypoglycemic medication and/or insulin) or with self-reported diabetes at time of the screening.
